# Supplementary material for: Urinary Dialkylphosphate Metabolite Levels in US Adults—National Health and Nutrition Examination Survey 1999–2008
Source: PubMed Central journal article supplement (PMC6926828; doi:10.3390/ijerph16234605), 2019-11-20
Supplement: ijerph-16-04605-s001.pdf [file ijerph-16-04605-s001.pdf]

## Supplementary

**Figure S1.** Time trends in urinary DMP metabolites in adults from 1999 to 2008.

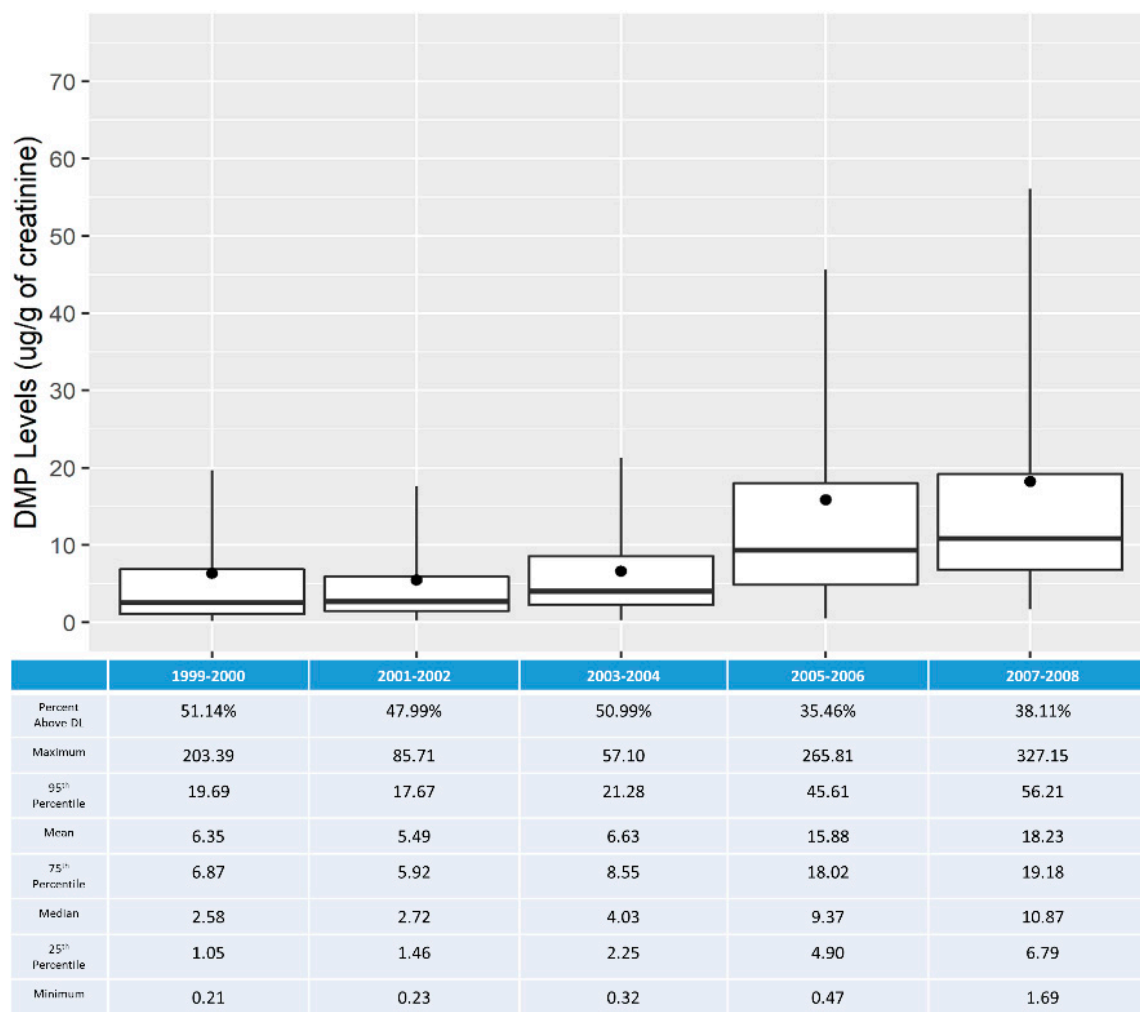

Boxplots represent the minimum, first quartile, median, third quartile, and 95<sup>th</sup> percentile values. Mean values are represented by the black circle.

**Figure S2.** Time trends in urinary DEP metabolites in adults from 1999 to 2008.

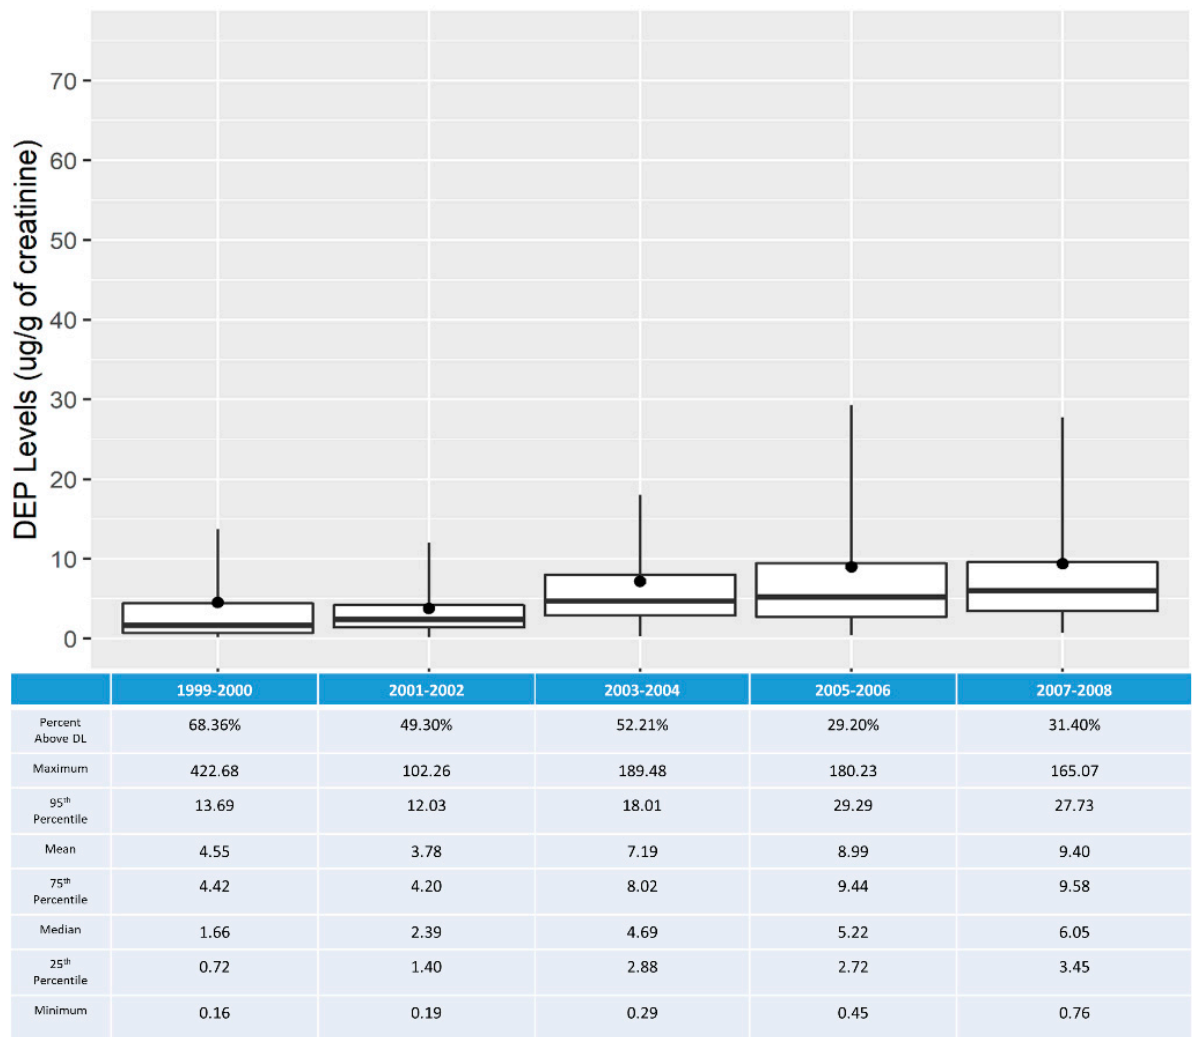

Boxplots represent the minimum, first quartile, median, third quartile, and 95<sup>th</sup> percentile values. Mean values are represented by the black circle.

**Figure S3.** Time trends in urinary DMTP metabolites in adults from 1999 to 2008.

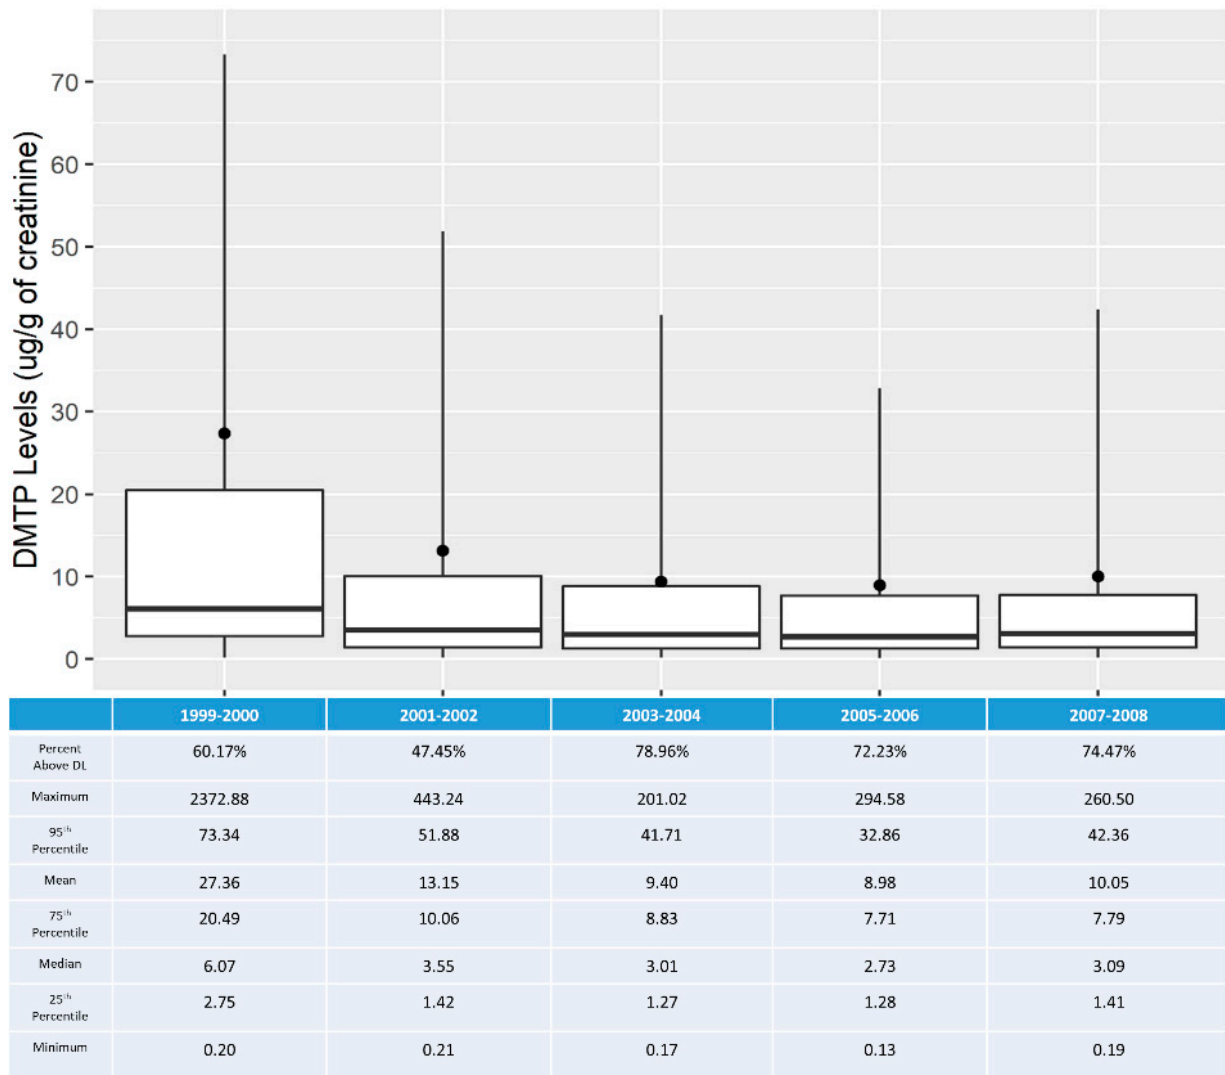

Boxplots represent the minimum, first quartile, median, third quartile, and 95<sup>th</sup> percentile values. Mean values are represented by the black circle.

**Figure S4.** Time trends in urinary DETP metabolites in adults from 1999 to 2008.

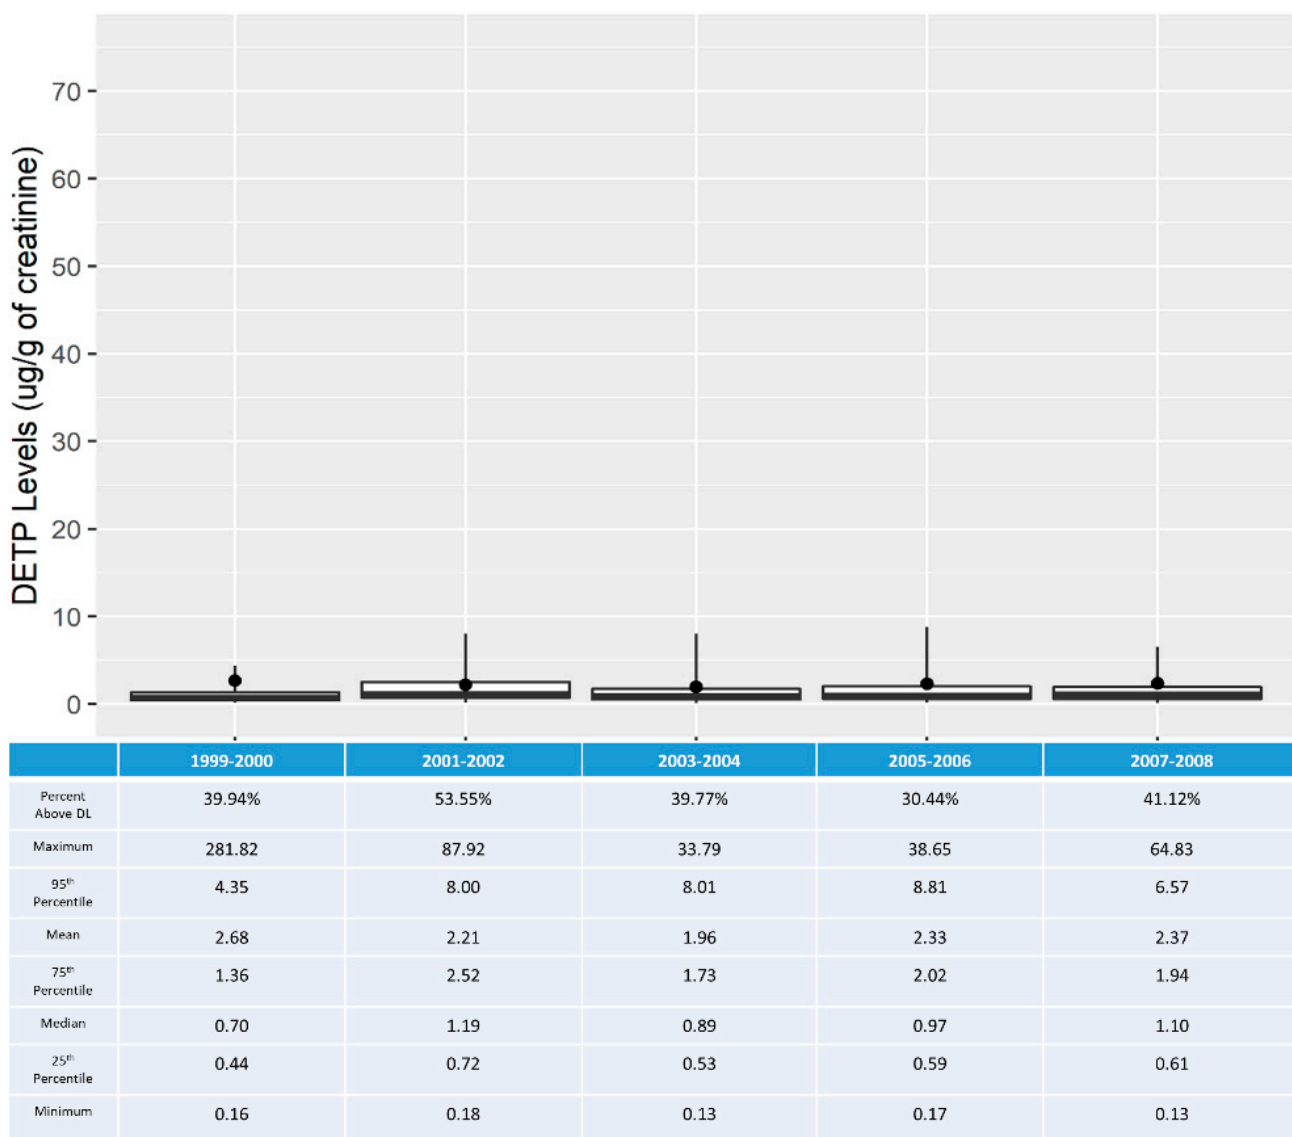

Boxplots represent the minimum, first quartile, median, third quartile, and 95<sup>th</sup> percentile values. Mean values are represented by the black circle.

**Figure S5.** Time trends in urinary DMDTP metabolites in adults from 1999 to 2008.

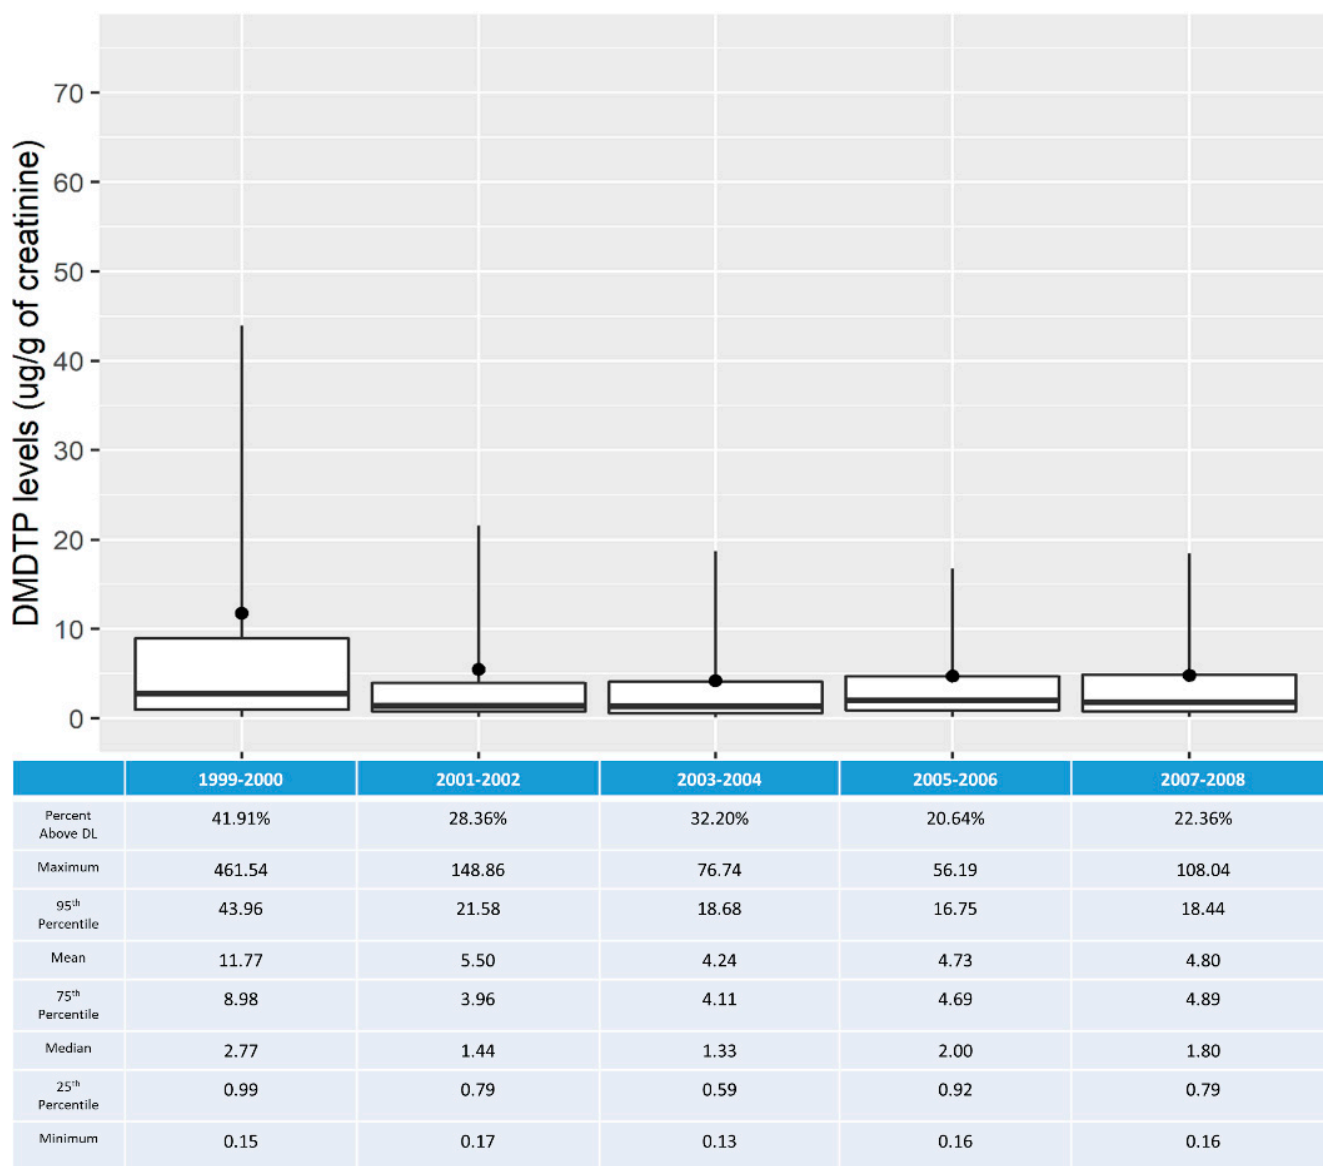

Boxplots represent the minimum, first quartile, median, third quartile, and 95<sup>th</sup> percentile values. Mean values are represented by the black circle.

**Figure S6.** Time trends in urinary DEDTP metabolites in adults from 1999 to 2008.

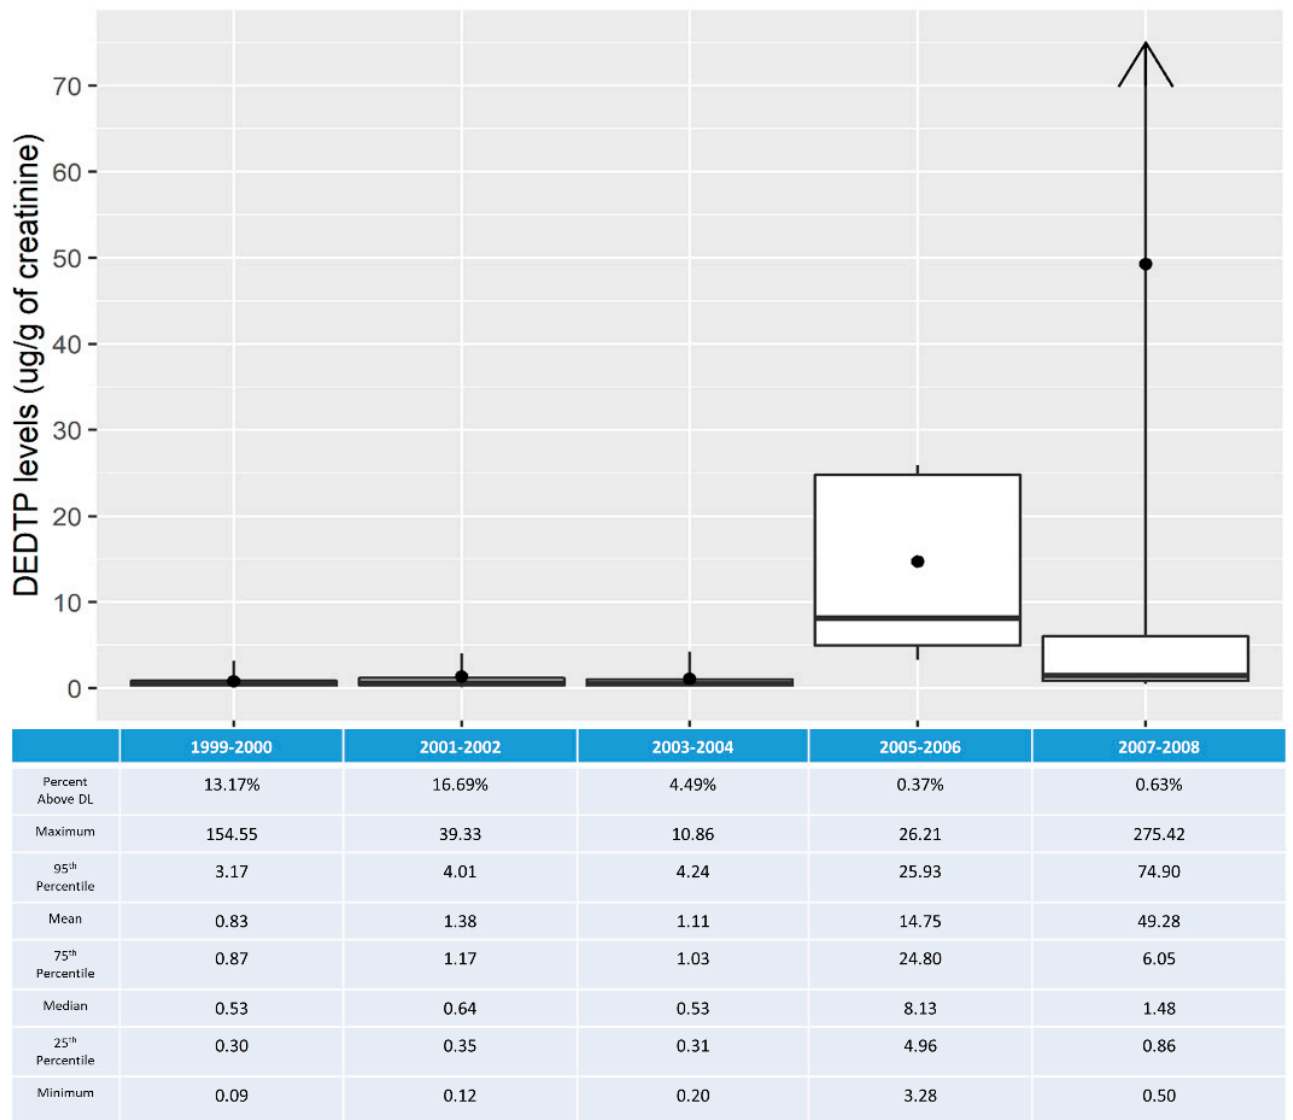

Boxplots represent the minimum, first quartile, median, third quartile, and 95<sup>th</sup> percentile values. Mean values are represented by the black circle.
